# Supplementary material
Source: Research Square preprint supplement (doi:10.21203/rs.3.rs-8943349/v1)
Supplement: Supplementary file 1 [file cb149d5011197e20d791df75.docx]

**Table 1: Materials description and Processing details**

| ***SS316L Composition of alloying elements (SUBSTRATE)*** | | | | | | | | | | | | |
| --- | --- | --- | --- | --- | --- | --- | --- | --- | --- | --- | --- | --- |
| Ni | P | Cr | Fe | | Si | C | Mn | S | | Mo | | N |
| 13.00 | 0.05 | 18.00 | Balance | | 1.00 | 0.03 | 2.00 | 0.02 | | 2.50 | | 0.10 |
| ***Ball Milling Process*** | | | | | | ***Material Combination*** | | | | | | |
| Milling Time | 40 minutes*3 times interval = 120 Minutes | | | | | **AL**  *(325 Mesh) Fine* | **Mg**  *(36 Mesh) Course* | | **Al2O3**  *(Nano-Powder)* | | **SiC**  *(Nano-Powder)* | |
| Idle Duration Interval | | | | 01 Hour | | 94% | 4% | | 2% | | - | |
| Weight Ratio | | | | 1:10 | | 94% | 4% | | - | | 2% | |
| ***Perforation of Substrate*** | | | | | | ***Compaction & Heating*** | | | | | | |
| Dimension | SS316L(30x30mm2) | | | | | Initial Compaction (UTM) | | | 22.2 MPa | | | |
| 0.8mm diameter, 4x4 matrix | | | | | Thickness between substrate | | | 02 mm | | | |
| Technique Used | Fiber laser technique (HSG 1000W G4015C) | | | | | Material for Slurry | Gelatin Gel | | Inert Gas Used during Heating | | | Argon |
| ***Polishing & Buffing (Grade)*** | | 150 | 320 | 600 | | Processing Temperature | 1100-1380 ºC (Industrial Muffle Furnace) | | | | | |
| ***Copper Sulphate test methodology for corrosion analysis (CuST)*** | | | | | | | | | | | | |
| Solution Preparation Constituents | | | | Mixing Time | | Dilution by Wt. | Continuous Swabbing of the Surface | | Copper deposits indicate the presence of metallic ions | | | |
| 08 gm CuSO4 + 2ml H2SO4 +500 ml Distilled water | | | | 05 Minutes | | 1.6% | 06 minutes | |

**Table 2: Elemental distribution for the EDX analysis for the clad surfaces after corrosion**

| Particular | Elements by wt. % | | | | | | |
| --- | --- | --- | --- | --- | --- | --- | --- |
| Combination↓ | C | O | Al | Si | Cr | Cu | S |
| 2%Al2O3-4%Mg-SS316L | 41.08 | 10.25 | 0.9 | 0.93 | 12.72 | 32.17 | 1.95 |
| 2%SiC-4%Mg-SS316L | 34.03 | 8.01 | 1.61 | 0.8 | 14.06 | 38.3 | 3.2 |

**Table 3: XRD evaluation for the 2%Al2O3/SiC-4%Mg-SS316L combinations**

| Combination | Phase Identified/Evaluation |
| --- | --- |
| 2%Al2O3-4%Mg-SS316L | Al+α-Al2O3, CrO2, CuO, Al2O3-Mg, Cu-Al2O |
| 2%SiC-4%Mg-SS316L | Al+SiO2, CuO, CrO2 , Cu-Mg2.5O, AlCr2, Si2CMg |
